# Supplementary material for: Fish Collagen Peptides Protect against Cisplatin-Induced Cytotoxicity and Oxidative Injury by Inhibiting MAPK Signaling Pathways in Mouse Thymic Epithelial Cells
Source: MDPI journal article supplement (doi:10.3390/md20040232), 2022-03-28
Supplement: s1 [file s1]

**Table S1.** Western blot antibodies

| Antibody       | Source                    | Antibody type     | Size (kDa) |
|----------------|---------------------------|-------------------|------------|
| Bcl-2          | Abcam                     | Rabbit polyclonal | 26         |
| Bcl-xL         | Abcam                     | Rabbit polyclonal | 26         |
| Bax            | Abcam                     | Rabbit polyclonal | 21         |
| Bad            | Abcam                     | Rabbit polyclonal | 18         |
| p38            | Cell Signaling Technology | Rabbit monoclonal | 40         |
| p-p38          | Cell Signaling Technology | Rabbit monoclonal | 43         |
| ERK            | Cell Signaling Technology | Rabbit monoclonal | 42,44      |
| p-ERK          | Cell Signaling Technology | Rabbit monoclonal | 42,44      |
| JNK            | Cell Signaling Technology | Rabbit monoclonal | 46,54      |
| p-JNK          | Cell Signaling Technology | Rabbit polyclonal | 46,54      |
| Cytochrome-c   | Santa Cruze Biotechnology | Mouse monoclonal  | 15         |
| Cyclin D1      | Cell Signaling Technology | Rabbit monoclonal | 36         |
| CDK1           | Abcam                     | Mouse monoclonal  | 34         |
| $\beta$ -actin | Santa Cruze Biotechnology | Mouse monoclonal  | 43         |
